# Supplementary material for: Synthesis, crystal structure and photophysical properties of lanthanide coordination polymers of 4-[4-(9H-carbazol-9-yl)butoxy]benzoate: the effect of bidentate nitrogen donors on luminescence
Source: Royal Society of Chemistry journal article supplement (doi:10.1039/c2dt31827j), 2012-01-01
Supplement: c2dt31827j.pdf [file c2dt31827j.pdf]

### Supplementary Information

## Synthesis, crystal structure and photophysical properties of lanthanide coordination polymers of 4-[4-(9H-carbazol-9-yl)butoxy]benzoate: The effect of bidentate nitrogen donors on luminescence

Shyni Raphael <sup>a</sup>, M. L. P. Reddy <sup>\*a</sup>, Kalyan V. Vasudevan <sup>b</sup> and Alan H. Cowley <sup>b</sup>

<sup>a</sup>Chemical Sciences and Technology Division, CSIR-Network Institutions on Solar Energy, National Institute for Interdisciplinary Science & Technology (NIIST), Thiruvananthapuram-695 019, India

E-mail: [mlpreddy55@gmail.com](mailto:mlpreddy55@gmail.com)

<sup>b</sup>Department of Chemistry and Biochemistry, The University of Texas at Austin, 1 University Station A5300, Austin, Texas 78712

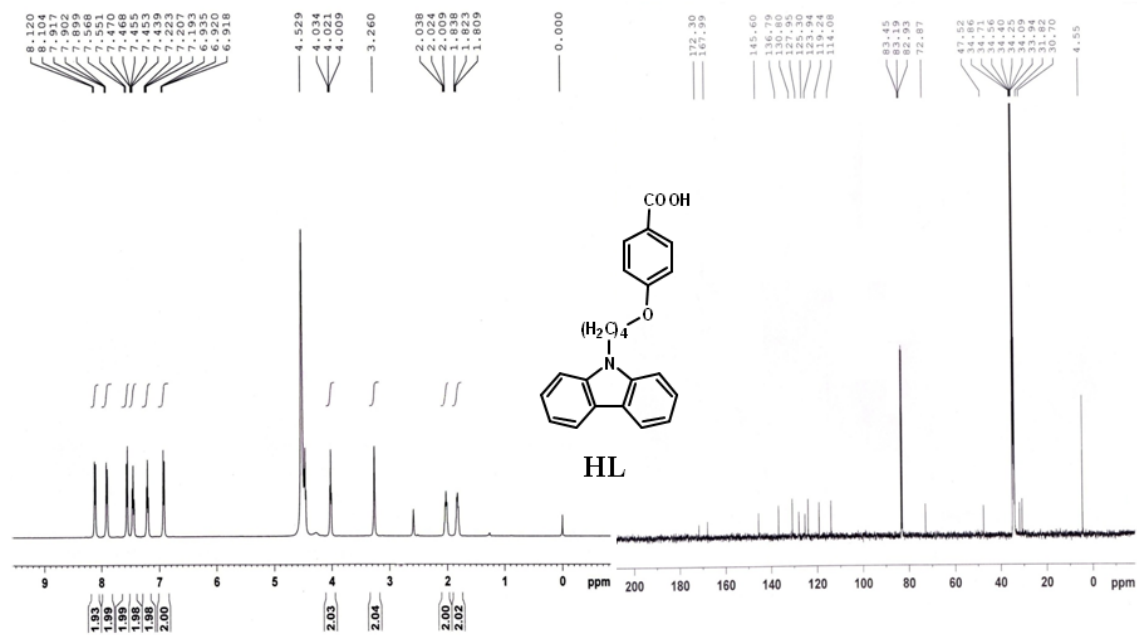

**Fig. S1** <sup>1</sup>H and <sup>13</sup>C NMR spectra for HL in Acetone-d<sub>6</sub> and CDCl<sub>3</sub> solution.

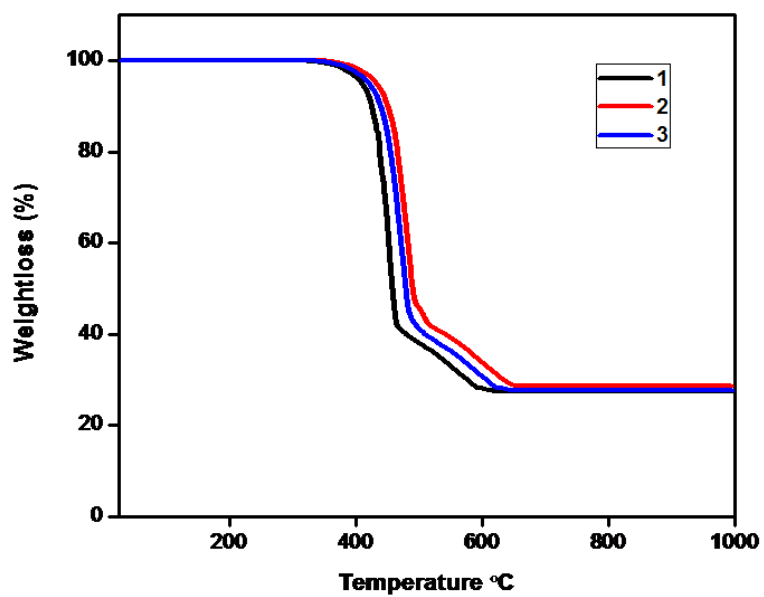

Fig. S2 Thermogravimetric curves for complexes 1-3.

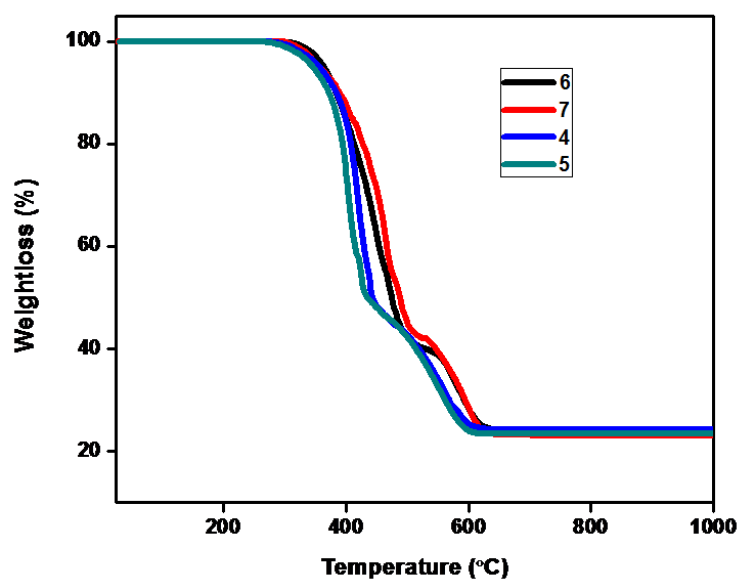

Fig. S3 Thermogravimetric curves for complexes 4-7.

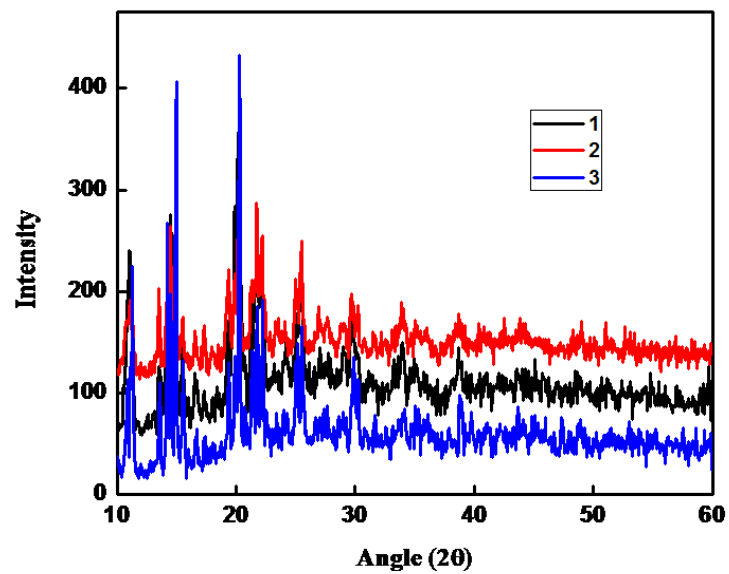

Fig. S4 XRD pattern for complexes 1, 2 and 3.

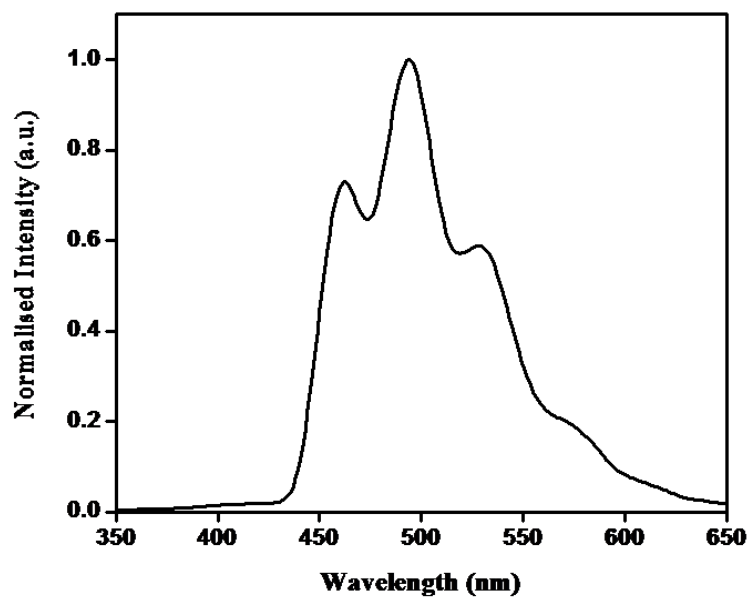

Fig. S5 Phosphorescence spectrum for [Gd(tmphen)(NO<sub>3</sub>)<sub>3</sub>] at 77 K.

**Table S1** Infrared vibrational frequencies for the carboxylate functionality of ligand HL and complexes **1-7**.

|               | $\nu(\text{C}=\text{N}) \text{ cm}^{-1}$ | $\nu_{\text{as}}(\text{C}=\text{O}) \text{ cm}^{-1}$ | $\nu_{\text{s}}(\text{C}=\text{O}) \text{ cm}^{-1}$ | $\Delta\nu_{(\text{C}=\text{O})} \text{ cm}^{-1}$ |
|---------------|------------------------------------------|------------------------------------------------------|-----------------------------------------------------|---------------------------------------------------|
| <b>HL</b>     | -                                        | 1696<br>1588                                         | 1425                                                | 163                                               |
| <b>phen</b>   | 1644                                     | -                                                    | -                                                   | -                                                 |
| <b>tmphen</b> | 1608                                     | -                                                    | -                                                   | -                                                 |
| <b>1</b>      | -                                        | 1594                                                 | 1422                                                | 172                                               |
| <b>2</b>      | -                                        | 1589                                                 | 1416                                                | 173                                               |
| <b>3</b>      | -                                        | 1588                                                 | 1414                                                | 174                                               |
| <b>4</b>      | 1615                                     | 1567, 1526                                           | 1453, 1424                                          | 114, 102                                          |
| <b>5</b>      | 1604                                     | 1558, 1526                                           | 1452, 1416                                          | 106, 110                                          |
| <b>6</b>      | 1619                                     | 1568, 1525                                           | 1453, 1424                                          | 115, 101                                          |
| <b>7</b>      | 1606                                     | 1563, 1527                                           | 1453, 1421                                          | 110, 106                                          |
